# Supplementary material for: Development of nucleus-targeted histone-tail-based photoaffinity probes to profile the epigenetic interactome in native cells
Source: PubMed Central journal article supplement — Nat Commun. 2025 Jan 6;16:415. doi: 10.1038/s41467-024-55046-8 (PMC11704063; doi:10.1038/s41467-024-55046-8), 2025-01-06
Supplement: 41467_2024_55046_MOESM2_ESM.pdf [file 41467_2024_55046_MOESM2_ESM.pdf]

## Reporting Summary

Nature Portfolio wishes to improve the reproducibility of the work that we publish. This form provides structure for consistency and transparency in reporting. For further information on Nature Portfolio policies, see our [Editorial Policies](#) and the [Editorial Policy Checklist](#).

### Statistics

For all statistical analyses, confirm that the following items are present in the figure legend, table legend, main text, or Methods section.

| n/a                                 | Confirmed                                                                                                                                                                                                                                                                                      |
|-------------------------------------|------------------------------------------------------------------------------------------------------------------------------------------------------------------------------------------------------------------------------------------------------------------------------------------------|
| <input type="checkbox"/>            | <input checked="" type="checkbox"/> The exact sample size ( $n$ ) for each experimental group/condition, given as a discrete number and unit of measurement                                                                                                                                    |
| <input type="checkbox"/>            | <input checked="" type="checkbox"/> A statement on whether measurements were taken from distinct samples or whether the same sample was measured repeatedly                                                                                                                                    |
| <input type="checkbox"/>            | <input checked="" type="checkbox"/> The statistical test(s) used AND whether they are one- or two-sided<br><i>Only common tests should be described solely by name; describe more complex techniques in the Methods section.</i>                                                               |
| <input checked="" type="checkbox"/> | <input type="checkbox"/> A description of all covariates tested                                                                                                                                                                                                                                |
| <input checked="" type="checkbox"/> | <input type="checkbox"/> A description of any assumptions or corrections, such as tests of normality and adjustment for multiple comparisons                                                                                                                                                   |
| <input type="checkbox"/>            | <input checked="" type="checkbox"/> A full description of the statistical parameters including central tendency (e.g. means) or other basic estimates (e.g. regression coefficient) AND variation (e.g. standard deviation) or associated estimates of uncertainty (e.g. confidence intervals) |
| <input type="checkbox"/>            | <input checked="" type="checkbox"/> For null hypothesis testing, the test statistic (e.g. $F$ , $t$ , $r$ ) with confidence intervals, effect sizes, degrees of freedom and $P$ value noted<br><i>Give <math>P</math> values as exact values whenever suitable.</i>                            |
| <input checked="" type="checkbox"/> | <input type="checkbox"/> For Bayesian analysis, information on the choice of priors and Markov chain Monte Carlo settings                                                                                                                                                                      |
| <input checked="" type="checkbox"/> | <input type="checkbox"/> For hierarchical and complex designs, identification of the appropriate level for tests and full reporting of outcomes                                                                                                                                                |
| <input checked="" type="checkbox"/> | <input type="checkbox"/> Estimates of effect sizes (e.g. Cohen's $d$ , Pearson's $r$ ), indicating how they were calculated                                                                                                                                                                    |

*Our web collection on [statistics for biologists](#) contains articles on many of the points above.*

### Software and code

Policy information about [availability of computer code](#)

|                 |                                                                                                                                                                                                                                                   |
|-----------------|---------------------------------------------------------------------------------------------------------------------------------------------------------------------------------------------------------------------------------------------------|
| Data collection | Shimadzu Prominence HPLC systems (Shimadzu Corp., Japan); LC/MS 2020 (SHIMADZU); Fusion FX EDGE SPECTRA (Vilber); Confocal Zeiss LSM 880; flow cytometer (CytoFLEX, Beckman); UV lamp (SCIENTZ; Model: SCIENTZ03-11); MicroCal PEAQ-ITC (Malvern) |
| Data analysis   | Microsoft Excel (2016); LabSolutions (SHIMADZU); Proteome Discoverer software (PD, version 1.4); GraphPad Prism                                                                                                                                   |

For manuscripts utilizing custom algorithms or software that are central to the research but not yet described in published literature, software must be made available to editors and reviewers. We strongly encourage code deposition in a community repository (e.g. GitHub). See the Nature Portfolio [guidelines for submitting code & software](#) for further information.

### Data

Policy information about [availability of data](#)

All manuscripts must include a [data availability statement](#). This statement should provide the following information, where applicable:

- Accession codes, unique identifiers, or web links for publicly available datasets
- A description of any restrictions on data availability
- For clinical datasets or third party data, please ensure that the statement adheres to our [policy](#)

The mass spectrometry proteomics data have been deposited to the ProteomeXchange Consortium (<http://proteomecentral.proteomexchange.org>) with the dataset identifier PXD055058, PXD055061, PXD055055 and PXD045620. Source data are provided with this paper.

## Research involving human participants, their data, or biological material

Policy information about studies with [human participants or human data](#). See also policy information about [sex, gender \(identity/presentation\), and sexual orientation](#) and [race, ethnicity and racism](#).

|                                                                    |     |
|--------------------------------------------------------------------|-----|
| Reporting on sex and gender                                        | n/a |
| Reporting on race, ethnicity, or other socially relevant groupings | n/a |
| Population characteristics                                         | n/a |
| Recruitment                                                        | n/a |
| Ethics oversight                                                   | n/a |

Note that full information on the approval of the study protocol must also be provided in the manuscript.

## Field-specific reporting

Please select the one below that is the best fit for your research. If you are not sure, read the appropriate sections before making your selection.

Life sciences  Behavioural & social sciences  Ecological, evolutionary & environmental sciences

For a reference copy of the document with all sections, see [nature.com/documents/nr-reporting-summary-flat.pdf](https://www.nature.com/documents/nr-reporting-summary-flat.pdf)

## Life sciences study design

All studies must disclose on these points even when the disclosure is negative.

|                 |                                                                                                                                                                                                                                                                 |
|-----------------|-----------------------------------------------------------------------------------------------------------------------------------------------------------------------------------------------------------------------------------------------------------------|
| Sample size     | The work performed here did not involve statistical analyses that would be impacted by sample size.                                                                                                                                                             |
| Data exclusions | No data were excluded from the analysis.                                                                                                                                                                                                                        |
| Replication     | Almost all experiments were repeated from 2-4 times. Several experiments were repeated independently (at different times and by different individuals) and some dependently (in parallel, by the same individual). All attempts at replication were successful. |
| Randomization   | Randomization was not relevant to this study because no grouped samples were involved.                                                                                                                                                                          |
| Blinding        | Blinding was not relevant to this study because no grouped samples were involved.                                                                                                                                                                               |

## Reporting for specific materials, systems and methods

We require information from authors about some types of materials, experimental systems and methods used in many studies. Here, indicate whether each material, system or method listed is relevant to your study. If you are not sure if a list item applies to your research, read the appropriate section before selecting a response.

### Materials & experimental systems

|                                     |                                                           |
|-------------------------------------|-----------------------------------------------------------|
| n/a                                 | Included in the study                                     |
| <input type="checkbox"/>            | <input checked="" type="checkbox"/> Antibodies            |
| <input type="checkbox"/>            | <input checked="" type="checkbox"/> Eukaryotic cell lines |
| <input checked="" type="checkbox"/> | <input type="checkbox"/> Palaeontology and archaeology    |
| <input checked="" type="checkbox"/> | <input type="checkbox"/> Animals and other organisms      |
| <input checked="" type="checkbox"/> | <input type="checkbox"/> Clinical data                    |
| <input checked="" type="checkbox"/> | <input type="checkbox"/> Dual use research of concern     |
| <input checked="" type="checkbox"/> | <input type="checkbox"/> Plants                           |

### Methods

|                                     |                                                    |
|-------------------------------------|----------------------------------------------------|
| n/a                                 | Included in the study                              |
| <input checked="" type="checkbox"/> | <input type="checkbox"/> ChIP-seq                  |
| <input type="checkbox"/>            | <input checked="" type="checkbox"/> Flow cytometry |
| <input checked="" type="checkbox"/> | <input type="checkbox"/> MRI-based neuroimaging    |

## Antibodies

|                 |                                                                                                                                                                                                                                                                                                                 |
|-----------------|-----------------------------------------------------------------------------------------------------------------------------------------------------------------------------------------------------------------------------------------------------------------------------------------------------------------|
| Antibodies used | Antibodies used include: Anti-His6 antibody (Abcam; ab18184, 1:2000 dilution), Anti- $\beta$ -Actin antibody (Cell Signaling Technology; #4970, 1:2000 dilution), anti-AF9 antibody (Cell Signaling Technology; #47577, 1:2000 dilution), Anti-H3K9la antibody (PTM BioLab, Inc.; PTM-1419RM, 1:1000 dilution). |
| Validation      | Abcam validates all their antibodies tested in their own labs, by their suppliers, or by selected trusted collaborators. This statement can be found at their website at <a href="https://www.abcam.com/help/abpromise-guarantee">https://www.abcam.com/help/abpromise-guarantee</a>                            |

Cell Signaling Technology validates all their antibodies in-house, in multiple research applications. This statement can be found at their website at <https://www.cellsignal.com/about-us/cst-antibody-performance-guarantee>  
 PTM BioLab, Inc states that the Anti-L-Lactyl-Histone H3 (Lys9) Rabbit mAb(PTM-1419RM) were tested in numerous studies, and a list of references can be found at their website at <http://www.ptm-biolab.com.cn/productDetail.html?id=5381>

## Eukaryotic cell lines

Policy information about [cell lines and Sex and Gender in Research](#)

|                                                                   |                                                                                                                                                      |
|-------------------------------------------------------------------|------------------------------------------------------------------------------------------------------------------------------------------------------|
| Cell line source(s)                                               | RAW264.7 was purchased from cellcook (CC9001) and HeLa was a generous gift from Yangzhong Liu (University of Science and Technology of China, Hefei) |
| Authentication                                                    | Cell lines were authenticated by STR testing.                                                                                                        |
| Mycoplasma contamination                                          | All cell lines tested negative for mycoplasma contamination.                                                                                         |
| Commonly misidentified lines (See <a href="#">ICLAC</a> register) | n/a                                                                                                                                                  |

## Plants

|                       |     |
|-----------------------|-----|
| Seed stocks           | n/a |
| Novel plant genotypes | n/a |
| Authentication        | n/a |

## Flow Cytometry

### Plots

Confirm that:

- The axis labels state the marker and fluorochrome used (e.g. CD4-FITC).
- The axis scales are clearly visible. Include numbers along axes only for bottom left plot of group (a 'group' is an analysis of identical markers).
- All plots are contour plots with outliers or pseudocolor plots.
- A numerical value for number of cells or percentage (with statistics) is provided.

### Methodology

|                           |                                                                                                                                                                                                     |
|---------------------------|-----------------------------------------------------------------------------------------------------------------------------------------------------------------------------------------------------|
| Sample preparation        | Cells were incubated with FBS free culture medium containing different probes. After 30 min, cells were washed three times to remove unabsorbed probes. Cells were resuspended in PBS and analyzed. |
| Instrument                | flow cytometer (CytoFLEX, Beckman)                                                                                                                                                                  |
| Software                  | CytExpert                                                                                                                                                                                           |
| Cell population abundance | n/a                                                                                                                                                                                                 |
| Gating strategy           | n/a                                                                                                                                                                                                 |

- Tick this box to confirm that a figure exemplifying the gating strategy is provided in the Supplementary Information.
